# Supplementary material for: The Human-Specific and Smooth Muscle Cell-Enriched LncRNA SMILR Promotes Proliferation by Regulating Mitotic CENPF mRNA and Drives Cell-Cycle Progression Which Can Be Targeted to Limit Vascular Remodeling
Source: PubMed Central journal article supplement (PMC6693924; doi:10.1161/circresaha.119.314876), 2019-07-23
Supplement: res-125-535-s002.pdf [file res-125-535-s002.pdf]

1 **Supplementary Material**  
2  
3  
4

5 **Title: The Human- and smooth muscle cell-enriched lncRNA SMILR promotes**  
6 **proliferation by regulating mitotic CENPF mRNA and drives cell-cycle progression**  
7 **which can be targeted to limit vascular remodelling.**  
8

9 **Authors:**

10 Amira D. Mahmoud<sup>1#</sup>, Margaret D. Ballantyne<sup>1#</sup>, Vladislav Miscianinov<sup>1</sup>, Karine Pinel<sup>1</sup>, John  
11 Hung<sup>1</sup>, Jessica P. Scanlon<sup>1</sup>, Jakub Kaczynski<sup>1</sup>, Adriana S. Tavares<sup>1</sup>, Angela C. Bradshaw<sup>2</sup>,  
12 Nicholas L. Mills<sup>1</sup>, David E. Newby<sup>1</sup>, Andrea Caporali<sup>1</sup>, Gwyn W. Gould<sup>3</sup>, Sarah J. George<sup>4</sup>,  
13 Igor Ulitsky<sup>5</sup>, Judith C. Sluimer<sup>6,1</sup>, Julie Rodor<sup>1</sup>, Andrew H. Baker<sup>1,6\*</sup>.  
14

15 **Affiliations:**

16 1 Queens Medical Research Institute, BHF Centre for Cardiovascular Sciences, University of  
17 Edinburgh, UK, EH16 4TJ.

18 2 Institute of Cardiovascular and Medical Sciences, BHF Cardiovascular Research Centre,  
19 University of Glasgow, UK

20 3 Institute of Molecular Cell and Systems Biology, College of Medicine, Veterinary and Life  
21 Sciences, University of Glasgow, UK, G12 8QQ

22 4 School of Clinical Sciences, University of Bristol, Research Floor Level Seven, Bristol Royal  
23 Infirmary, Upper Maudlin St., Bristol BS2 8HW, UK

24 5 Department of Biological Regulation, Weizmann Institute of Science, Rehovot, Israel

25 6 Department of Pathology, Maastricht University Medical Center, Maastricht, the Netherlands

26 # Equal contributions

27 \* Corresponding Author and Lead Contact: Andrew H. Baker, University of Edinburgh, BHF  
28 Centre for Cardiovascular Sciences, Queen's Medical Research Institute, 47 Little France  
29 Crescent, Edinburgh UK, EH16 4TJ, Tel: 0131 24 26728, Email: Andy.Baker@ed.ac.uk.  
30

31

## 32 **SUPPLEMENTAL METHODS**

33

### 34 **Human tissues samples**

35 Excess human saphenous vein (HSV) tissue was obtained from patients who have  
36 given their written, informed consent prior to undergoing CABG surgery. Carotid plaques  
37 were obtained from patients undergoing endarterectomy following an acute and symptomatic  
38 neurovascular event. All procedures had local ethical approval (15/ES/0094).

### 39 **HSV smooth muscle cell culture**

40 Primary HSV derived smooth muscle cells (HSVSMCs) were isolated from medial explants  
41 and maintained and treated with IL1-PDGF, dicer substrate siRNA, and lentiviral infections,  
42 as previously described by Ballantyne et al. <sup>17</sup>.

### 43 **Dicer substrate siRNA (dsiRNA) mediated transfection**

44 Double stranded dicer substrate siRNA targeting SMILR, STAU1, CENPF, AURKB  
45 and siControl were obtained from Integrated DNA Technologies, Leuven, Belgium (See  
46 Supplementary Table 3 for sequences). The siControl does not target any sequence in the  
47 human, mouse, or rat transcriptomes. Transient transfection was performed with  
48 Lipofectamine RNAiMAX (Life Technologies) following the manufacturer's guidelines.  
49 Cells were transfected with siRNA and five hours post transfection, cells were quiesced for  
50 48 h in DMEM supplemented with 100 mg/mL of penicillin, 100 IU/mL streptomycin, 2 mM  
51 L-glutamine, and 0.2% [v/v] FCS and then stimulated for a further 48 or 96h with fresh 0.2%  
52 media containing 10 ng/mL IL1 $\alpha$  and 20 ng/mL PDGF- $\beta\beta$  (R&D Systems).

53

### 54 **Lentiviral mediated infection**

55 Lentiviral vectors were produced by triple transient transfection of HEK293T cells  
56 with a packaging plasmid (pCMV $\Delta$ 8.74), a plasmid encoding the envelope of vesicular

57 stomatitis virus (VSVg) (pMDG) (Plasmid Factory, Bielefeld, Germany) and pLNT/SFFV-  
58 MCS plasmid employing polyethylenimine (PEI; Sigma-Aldrich, St Louis, USA) as  
59 previously described <sup>1</sup>. Lentiviral titres were ascertained by TaqMan quantitative real-time  
60 PCR (qRT-PCR) using the following primer/probe sequences: forward, 5'-  
61 TGTGTGCCCCGTCTGTTGTGT-3'; reverse, 5'- GAGTCCTGCGTCGAGAGAGC-3'; probe,  
62 5'-(FAM)-CAGTGGCGCCCGAACAGGGA- (TAMRA)-3. A confluent monolayer of  
63 smooth muscle cells were plated and quiesced for 48 hours prior to being infected with either  
64 SMILR\_LNT or the FUCCI virus (kind gift from Dr. Alan Serrels, Edinburgh, UK).  
65 Following 24 h infection, media was changed to 0.2% media for a further 24h before being  
66 stimulated with 10 ng/mL IL1 $\alpha$  and 20 ng/mL PDGF- $\beta\beta$  for further 96h.

67

#### 68 **Inhibition of transcription factors**

69 Growth-arrested HSVSMCs were treated for 1 hour with JSH-23 (NFKB inhibitor 40  
70  $\mu$ M), 3930 (NFAT inhibitor 50  $\mu$ M) or SR 11302 (AP1 inhibitor 1  $\mu$ M) prior to stimulation  
71 with IL1 and PDGF for 72 h. Total cellular RNA was isolated and levels of SMILR and  
72 positive control MKI67 examined via qRT-PCR.

73

#### 74 **RNAseq analysis**

75 RNAseq was performed on RNA extracted and DNase treated samples using the  
76 miRNeasy mini kit (Qiagen) obtained from three replicates of SMILR depletion and  
77 overexpression samples as well as from “stable” and “unstable” plaque section obtained from  
78 4 independent patients.

79 Ribosomal-depleted unstranded libraries were prepared by GENEWIZ, Inc. (South  
80 Plainfield, New Jersey, USA) and were sequenced with Illumina HiSeq (paired end  
81 2x100bp). Between 34 and 40 million paired reads were obtained for “SMILR” RNAseq

82 analyse protein-coding gene differential expression. For the atherosclerosis RNAseq, we  
83 obtained between 57 and 72M paired end read, allowing a deeper coverage. Gene  
84 quantification (read count and FPKM) was obtained using RSEM (options: -bowtie2 -paired-  
85 end) <sup>2</sup>, based on GENCODE annotation (Release 25). For both RNA-sequencing experiments  
86 the differential expression was performed utilizing edgeR <sup>4</sup>. We considered a threshold of  
87 absolute Fold Change  $\geq 1.5$  and adjusted pvalue  $< 0.05$  to identify significant changes  
88 between two conditions.

89 Sample clustering was evaluated using the Principal component analysis (PCA) tool available  
90 in DESeq2 on the regularized log transformed data. The 3D plot was obtained using the rgl R  
91 package.

92 The gene ontology analysis was done using topGO <sup>6</sup> on enriched genes over a  
93 background of expressed genes (FPKM  $> 2$  in at least one condition). Fisher's exact test was  
94 used to calculate the p-values.

95 Both data set are deposited in the Gene Expression Omnibus (GEO) repository, study  
96 number GSE120521 for the atherosclerosis RNAseq and GSE117608 for SMILR RNAseq.

97

### 98 **Fluorescent Imaging**

99 HSVSMC were transfected with siControl, siSMILR, or siAURKB, and plated at 1 x  
100 104 cells per well in a 6-well plate containing coverslips, before being quiesced and then  
101 stimulated with IL-PDGF for 96h. They were then fixed in 4% paraformaldehyde (PFA) for  
102 10min and then permeabilised with 0.1% Triton X for 2-3min before adding Phalloidin-  
103 iFluor 488 reagent CytoPainter (Abcam) for 20min and imaged using Andor Revolution XDi  
104 spinning disk confocal microscope. HSVSMCs infected with FUCCI virus as described  
105 above were also imaged using the Andor Revolution XDi spinning disk confocal microscope.

106

**Flow cytometry**

Single-cell suspensions of FUCCI-infected HSVSMCs were fixed for 5 min in 70% Ethanol, followed by an incubation in PBS/1% BSA containing for 1h at 4°C and then resuspended in PBS for FACs analysis on the BD LSR5 Fortessa Analytic Flow Cytometer. Dot plots were generated using FlowJo software.

**Gene expression quantitative RealTime-PCR (qRT-PCR)**

For gene expression analysis, cDNA for mRNA analysis was obtained from total RNA using the Multiscribe Reverse Transcriptase (Life technologies, Paisley, UK). qRT-PCR was performed using Power SYBR green (Life Technologies) with custom PCR primers (Eurofins MWG, Ebersberg, Germany, Supplementary Table 2 – primer sequences). Alternatively, qRT-PCR was performed using Universal Taqman Master Mix™ (Applied Biosystems) with Taqman probes (Supplementary Table 4). Ubiquitin C (UBC) were selected as housekeeping genes due to their stability across all groups and conditions studied. Fold-changes were calculated using the  $2^{-\Delta\Delta C_t}$  method <sup>7</sup>

**vSMCs EdU Incorporation assay**

Similar to <sup>1</sup>, HSVSMCs proliferation was quantified using EdU according to the manufacturer's instructions. Briefly, cells were plated and quiesced in 0.2% FCS media for 48 h prior to stimulation. Fresh media was then added with EdU for the times stated. Cells were then fixed in 70% ethanol for EdU FACs analysis. EdU incorporation was quantified using Click-it EdU Proliferation assay with an Alexa Fluor 594 antibody according to the manufacturer's protocol (Life Technologies).

**T7-SMILR production and biotinylation**

132 To generate 50pmol of biotinylated lncRNA required for each RNA-Protein Pull-  
133 down, 1µg of cDNA is used as a template for T7 RNA polymerase in vitro transcription using  
134 T7 RiboMAX Express Large Scale RNA Production System Protocol (Promega) and the T7  
135 primer sequences listed in Supplementary Table 1. The resulting RNA is extracted using the  
136 miRNeasy mini kit (Qiagen) following manufacturer's instructions. Commercially available  
137 pCp – Desthiobiotin (Jena Biosciences) are then attached to the 3' end of the RNA strand  
138 using T4 RNA ligase and Pierce RNA 3' End Desthiobiotinylation kit (Thermo Scientific).  
139

#### 140 **RNA-antisense Probe Pulldown**

141 Antisense DNA probes were designed targeting the full length sequence of SMILR <sup>1</sup>  
142 or GFP (used as negative control) using the online designer at  
143 <https://www.biosearchtech.com/stellaris-designer>. Probes mapping to tandem repeat  
144 sequences or to homologous genes were excluded. 10 probes of 40bp were generated for  
145 SMILR and 5 for GFP (Sequences in Supplementary Table 5). The SMILR probes were split  
146 into two sets based on their relative positions along the gene sequence and were accordingly  
147 referred to as even or odd capture oligo sets. All probes were biotinylated at the 3' end with an  
148 extended 15 atom triethylene glycol spacer arm (IDT).

149 SVSMCs stimulated with IL-PDGF for 48h were rinsed once with PBS before  
150 crosslinking with 2% formaldehyde at 37C for 10min. Crosslinking was quenched with  
151 500mM glycine at 37°C for 5min and then the cells were washed with ice cold PBS.  
152 Subsequently, cells were scraped in ice cold PBS + 0.5% BSA Fraction V and moved into  
153 Falcon tubes and centrifuged and pelleted at 1,000g. Thereafter, the supernatant was removed  
154 and the pellet was resuspended in scraping buffer. At this point, cells were counted and the  
155 resuspended pellet was divided into falcon tubes of 20 million cells each. These were then  
156 pelleted again at 2,000g and snap frozen and stored in -80C for subsequent steps.

157 To prepare lysates for pulldown, cell pellets were quickly thawed in a 37 °C water  
158 bath and resuspended in cell lysis buffer (50 mM Tris, pH 7.0, 10 mM EDTA, 1% SDS, and  
159 added just before use: dithithreitol (DTT), phenyl-methylsulphonyl fluoride (PMSF), and  
160 RNase inhibitor) on ice for 10 min. Cell lysates were then diluted in double the volume of  
161 hybridization buffer (500 mM NaCl, 1% SDS, 100 mM Tris, pH 7.0, 10 mM EDTA, 15%  
162 formamide, and added just before use: DTT, PMSF, protease inhibitor, and RNase inhibitor.  
163 Probes (50 pmol each) were added to lysate, which was mixed by end-to-end rotation at 4°C  
164 overnight. Streptavidin-magnetic C1 beads were washed three times in cell lysis buffer, 500µl  
165 of beads was added to hybridization reaction and the whole reaction was mixed for 30 min at  
166 37°C. Beads–biotin–probes–RNA adducts were captured by magnets (Invitrogen) and washed  
167 five times with a wash buffer (2×SSC, 0.5% SDS, fresh PMSF added). After the last wash,  
168 buffer was removed and beads were resuspended in 200µl RNA proteinase K buffer (100 mM  
169 NaCl, 10 mM Tris, pH 7.0, 1 mM EDTA, 0.5% SDS) with fresh 1 mg ml<sup>-1</sup> proteinase K  
170 added (Ambion). After incubation at 50°C for 45 min, followed by boiling for 10 min, RNA  
171 was spiked with 75ng of total *C. elegans* RNA to use AMA1 as a reference gene as  
172 previously described<sup>1</sup> was isolated using the chloroform isoamyl approach. Eluted RNA was  
173 subject to DNase treatment (TURBO DNase-free kit, Ambion) followed by qRT–PCR for the  
174 detection of enriched transcripts.

175

### 176 **Predicting SMILR-RNA interactions**

177 Sum energy based ranking method was used to predicate SMILR and RNA interactions<sup>8</sup>. We  
178 first filtered the top100 list based on their expression levels in IL1-PDGF stimulated vSMCs  
179 in our control RNAseq samples (i.e. siControl and Null LNT). Genes falling below the  
180 expression threshold of an FPKM < 1 were discarded. We then considered all the remaining  
181 expressed genes and filtered through those that were found to be modulated following

182 SMILR knockdown or overexpression. However, as we know that SMILR's upregulation and  
183 function is dependent on IL1-PDGF stimulation, we further filtered the genes that were  
184 differentially regulated with IL1-PDGF from 0.2% based on RNAseq data from Ballantyne et  
185 al. 2016, <sup>1</sup>.

186

### 187 **SMILR-Protein pulldown**

188 Streptavidin magnetic beads are used to capture the biotinylated RNA target, after  
189 which, 20µg of smooth muscle cell lysate are incubated with the magnetic bead/RNA  
190 complex. This was performed using the Pierce Mag RNAProtein Pulldown kit (Thermo  
191 Scientific). Stringent washes then removed any non-specific RNA-protein interactions and  
192 the remaining lncRNA-binding proteins are eluted using a non-denaturing biotin elution  
193 buffer for downstream analysis, i.e. liquid chromatography mass spectrometry (LC-MS).

194

### 195 **Mass spectrometry**

196 In excess of 2µg of eluted proteins were separated by polyacrylamide gel  
197 electrophoresis (PAGE) and visualised using a Coomassie stain. The protein bands are  
198 excised before undergoing an in-gel trypsin digestion for LC-MS. LC-MS is performed on a  
199 Q exactive mass spectrometer coupled to an Ultimate 3000 RSLCNano System (Dionex;  
200 Thermo Fisher Scientific). Data analysis was then performed using the MaxQuant software  
201 platform (ver. 1.5.2.8) and searches were conducted against a Human Uniprot database.  
202 Subtractive proteomics was used to identify proteins only detected in SMILR pulldowns and  
203 only proteins with at least 2-fold enrichment (LFQ) in SMILR pulldowns versus GFP and/or  
204 background (beads only pulldown), with at least 2 unique peptides, were considered for  
205 further downstream analysis and validation.

206



207 **STAU1 Pulldowns**

208 SVSMCs stimulated with IL-PDGF for 48h were rinsed once with PBS before  
209 crosslinking with 2% formaldehyde at 37°C for 10min. Crosslinking was quenched with  
210 500mM glycine at 37°C for 5min and then the cells were washed with ice cold PBS.  
211 Subsequently, cells were scraped in ice cold PBS + 0.5% BSA Fraction V and moved into  
212 Falcon tubes and centrifuged and pelleted at 1,000g. Thereafter, the supernatant was removed  
213 and the pellet was resuspended in scraping buffer. At this point, cells were counted and the  
214 resuspended pellet was divided into falcon tubes of 20 million cells each. These were then  
215 pelleted again at 2,000g and snap frozen and stored in -80C for subsequent steps.

216 Cell pellets were thawed at 37°C and resuspended in cell lysis buffer (50 mM Tris, pH  
217 7.0, 10 mM EDTA, 1% SDS, and added just before use: dithithreitol (DTT), phenyl-  
218 methylsulphonyl fluoride (PMSF), and RNase inhibitor) on ice for 10 min. 13. Samples  
219 were then precleared with Dynabeads G (ThermoFisher) at 4°C for 1 h using an inversion  
220 shaker that rotates the tubes end-to-end.

221 Then using a DynaMag-2 (ThermoFisher), beads were collected against the magnet  
222 and the supernatant was split evenly into two fresh Eppendorf. In each of the two tubes, fresh  
223 Dynabeads G, cOmplete Mini, EDTA-free Protease Inhibitor Cocktail tablets (Roche) and  
224 RNase inhibitors were added, and then either 4µg of mouse IgG (Abcam) or Stau1  
225 antibodies (Santa Cruz Biotechnology) were added. The samples were then rotating at 4°C for  
226 2-3 h before being washed using the DynaMag-2 5 times using NET-2 buffer (50 mM Tris-  
227 HCl pH 7.4, 200 mM NaCl, 0.05% NP40, and cOmplete Mini, EDTA-free Protease Inhibitor  
228 Cocktail tablets (Roche), and RNase inhibitors). After the last wash, buffer was removed and  
229 beads were resuspended in 200µl RNA proteinase K as described previously. After  
230 incubation at 50°C for 45 min, followed by boiling for 10 min, RNA was isolated using the

231 chloroform isoamyl approach. Eluted RNA was subject to DNase treatment (TURBO DNase-  
232 free kit, Ambion) followed by qRT-PCR for the detection of enriched transcripts.

233

### 234 **Western blotting**

235 Protein lysates were obtained by lysis of stimulated HSVSMC with RIPA buffer. For  
236 STAU1 western blots, membranes were incubated with primary mouse monoclonal antibody  
237 for STAU1 (Santacruz, Stau1 D-5, 1:500) at 4°C overnight. Alpha tubulin (Abcam, ab18251,  
238 1:2000) was utilised as a loading control. After washing, membranes were incubated with the  
239 appropriate Licor IRDye® 800 secondary antibody (1:20,000) at room temperature for 1 h.  
240 Following additional washing protein levels were visualised via Licor.

241

### 242 **In Vivo Studies Atherosclerosis Studies: Patients, Imaging and Sampling**

243 Similar to Ballantyne et. al. <sup>1</sup> patients with symptomatic carotid artery stenosis  
244 scheduled to undergo carotid endarterectomy were recruited from neurovascular clinics at the  
245 Royal Infirmary of Edinburgh to undergo separate [18F]-fluoride and [18F]-  
246 fluorodeoxyglucose ([18F]-FDG) positron emission tomography <sup>9</sup> combined with computed  
247 tomography (CT) scans with the use of a hybrid scanner (Biograph mCT, Siemens Medical  
248 Systems, Erlangen, Germany). Both of these tracers have been used by our group and others  
249 for plaque imaging and highlight high-risk actively calcifying <sup>9</sup> and inflamed or hypoxic  
250 atherosclerotic plaques and were administered as previously described in <sup>1,9</sup>. PET tracer  
251 uptake was quantified using an OsiriX workstation (OsiriX version 3.5.1 64-bit; OsiriX  
252 Imaging Software, Geneva, Switzerland). PET/CT image data were reviewed for evidence of  
253 tracer uptake, image quality and registration. The CT angiogram was examined to establish  
254 plaque presence, location and characteristics. Regions of interest were then drawn on three  
255 adjacent 3-mm PET slices to incorporate the internal carotid artery plaque. Three ROI were

256 then drawn around adjacent healthy portions of carotid artery and the lumen of the SVC to  
257 derive control values for “normal” arterial uptake and the blood pool respectively. Arterial  
258 standardized uptake values (SUV) were recorded and also indexed to blood pool activity thus  
259 giving a target-to-background-ratio (TBR).

260 At the time of surgery, plaques were collected immediately following excision and  
261 photographed. Two-millimeter diameter core biopsy specimens for RNA analysis were taken  
262 from regions of focally high uptake on PET and from normal tissue at the periphery of the  
263 endarterectomy specimen. These, along with the main specimen, were immediately frozen  
264 and placed in an -80°C fridge for subsequent batch analysis.

265

#### 266 **RNA in situ hybridization of human carotid atherosclerotic plaques**

267 Formalin-fixed paraffin embedded (FFPE) tissue slides were deparaffinised in xylene and  
268 ethanol (100%, 96%, 70%) solutions at room temperature ending up in RNase-Free water  
269 followed by RNase-Free PBS wash. The tissue was then treated with 1:1000 Proteinase K  
270 (miRCURY LNA miRNA ISH Buffer Set (FFPE), Qiagen) diluted in RNase-Free PBS for 5  
271 minutes at 37C. After serial RNase-Free PBS washes the LNA SMILR and scrambled RNA  
272 probes (IDT) were applied onto the tissue, diluted in 1x Formamide-free miRNA ISH buffer  
273 (miRCURY LNA miRNA ISH Buffer Set (FFPE); Qiagen) at 60 nM final concentrations.  
274 The tissue slides were hybridized in 55C for 1 hour. The tissue slides were then washed in 5x  
275 SSC buffer (made up with RNase-Free water from 20x SSC, ThermoFisher Scientific) at 55C  
276 followed by one room temperature wash. The tissue was then blocked with 1x blocking  
277 buffer (made up with maleic acid from 10x blocking reagent, Roche) for 1 hour followed by  
278 the incubation with Anti-Digoxigenin-AP diluted 1:500 in 1x blocking buffer (Fab fragments,  
279 Roche) over night. The tissue slides were then washed three times with RNase-Free PBST  
280 and incubated with the detection solution prepared by diluting NBT/BCIP tablet (Roche) in

281 10 mL of RNase-Free water with 40  $\mu$ L of Levamisole solution (SP-5000-18). The reaction  
282 was stopped after 30-40 minutes, the tissue was washed with RNase-Free PBS and  
283 counterstained with Nuclear Fast Red solution (Sigma) for 5 minutes. The tissue was then  
284 dehydrated (ethanol 70%, 80%, 95%, 100% 20 seconds each followed by 2 minutes in  
285 xylene) and mounted with xylene-based mounting medium. Zeiss Axio Scan.Z1 Slide  
286 Scanner was used to take the images, which were analyzed with Zen software.

287

### 288 **RNA-Fluorescent in-situ hybridization**

289 Custom RNA-FISH tiled probe sets were generated to all exons of SMILR<sup>1</sup> and CENPF  
290 (Thermo Fisher Scientific). RNA-FISH was performed according to manufacturer's  
291 instructions (ViewRNA™ cell FISH) with minor changes. HSVSMCs were grown on 16-mm  
292 coverslips to 80% confluency, washed in PBS and fixed in 4% paraformaldehyde with 1%  
293 glacial acetic acid. Following detergent QS permeabilisation and 1:6000 protease digest,  
294 coverslips were incubated with a combination of SMILR and CENPF probe sets. Probe set  
295 buffer was used as a negative control and specificity of probes were tested under siSMILR  
296 and siCENPF conditions. Following probe hybridisation, cover slips were incubated with  
297 branched tree technology pre amplifier for 1h and then with the amplifier for 30 min.  
298 Coverslips were then mounted onto glass slides using VECTASHIELD Antifade Mounting  
299 Medium with DAPI (Vector Laboratories) and imaged using Andor Revolution XDi spinning  
300 disk confocal microscope.

301

### 302 **Cellular Fractionation**

303 RNA fractionation was performed according to the manufacturer's instructions provided in  
304 the PARIS™ Kit (Thermo Fisher) on HSVSMCs that were plated at  $1 \times 10^5$  cells per well in a  
305 6 well culture dish and transfected with siRNA and stimulated as described above.

### 306 **Human Saphenous Vein (HSV) Organ Culture**

307 HSV surplus segments were collected as detailed previously<sup>18</sup>. The vein was placed in  
308 PBS. The adventitial layer was removed, and the vein was opened longitudinally and cut  
309 transversely into three 5-10 mm segments. Vein segments were pinned down with minuten  
310 pins on a Sylgard coated dissection dish with the luminal surface facing upward for up to 14  
311 days in DMEM supplemented with 100 mg/mL of penicillin, 100 IU/mL streptomycin, 2 mM  
312 L-glutamine, and 10% [v/v] fetal calf serum [FCS] (and with 10  $\mu$ M EdU for the medial  
313 proliferation assay) and cultured separately. The organ culture growth media was changed  
314 every 2 days. At day 0 and after 7 and 14 days of culture, the vein segments were washed in  
315 PBS and snap frozen for subsequent RNA extraction or fixed in 4% PFA for histology.

### 316 **Proliferation in HSV Organ Cultures**

317 Paraffin wax-embedded sections were assessed by Click-iT® EdU Alexa Fluor® 488 In Vivo  
318 Imaging Kit. Formalin-fixed paraffin embedded (FFPE) sections (3 $\mu$ m) were deparaffinised in  
319 3x clearane (Leica Biosystems) and 3x 100% ethanol washes, 5 minutes each at room  
320 temperature ending up in ultrapure water followed by PBS wash. Tissue was then washed in  
321 3% BSA/PBS and permeabilized with 0.5% Triton/PBS. After serial 3% BSA/PBS washes,  
322 tissue was incubated with a Click-iT® EdU reaction cocktail for 30 minutes in the dark at room  
323 temperature. Slides were then washed in 3% BSA/PBS, followed by PBS and incubated with  
324 1:700 DAPI for 15 minutes. Slides were then washed in PBS and mounted with PermaFluor™  
325 Aqueous Mounting Medium (Thermo Scientific™). Quantification of the EdU incorporation  
326 was carried out by calculating the percentage of EdU-positive cells in the media.

327

### 328 **siRNA Intervention in HSV Organ Culture**

329 HSV segments cut in equal pieces of approximately 1 cm<sup>2</sup> were bathed in PBS containing  
330 25µM siSMILR, cy3-siSMILR and scrambled siRNA control for 30 minutes in 24-well plate.  
331 After 30 minutes of incubation, the vein segments were washed with PBS and pinned down  
332 with minuten pins on a Sylgard coated dissection dish with the luminal surface facing upward  
333 for up to 14 days in DMEM supplemented with 100 mg/mL of penicillin, 100 IU/mL  
334 streptomycin, 2 mM L-glutamine, and 10% [v/v] fetal calf serum [FCS] (and with 10 µM EdU  
335 for the medial proliferation assay) and cultured separately. The organ culture growth media  
336 was changed every 2 days. At day 3, day 7 and day 14 of culture, the vein segments were  
337 washed in PBS and snap frozen for subsequent RNA extraction or fixed in 4% PFA for  
338 histology.

### 339 **Cy3-siSMILR and αSMA co-staining**

340 At day 3 post-Cy3-siSMILR treatment, HSV segment was cryopreserved in OCT. 5 µm tissue  
341 sections were cryosectioned and fixed for 15 minutes in 4% PFA made up in PBS. Sections  
342 were washed 3 times in PBS, blocked and permeabilized in PBS containing 5% goat serum and  
343 0.1% Triton X-100 for 1 h, and incubated with primary antibody, anti-αSMA (DAKO, M0851,  
344 1:100), diluted in blocking solution overnight at 4°C. Sections were subsequently washed in  
345 PBS containing 0.1% Triton X-100, incubated in the secondary antibody, goat anti-Mouse IgG  
346 (H+L), Alexa Fluor® 488 (Invitrogen, A28175, 1:500) for 2 h, and washed with PBS three  
347 times. Sections were mounted in ProLong™ Gold Antifade Mountant with DAPI (Invitrogen,  
348 P36935). Images were acquired using Zeiss Cell Observer spinning disc confocal microscope.  
349 Cy3-siSMILR signal was visualized at 555 wavelength.

350

### 351 **Quantification of CENPF protein level in HSV media**

352 Human saphenous veins were harvested and fixed in 4% buffered formalin for  
353 paraffin embedding, before being sectioned (5  $\mu$ m) and mounted onto poly-L-lysine coated  
354 slides. The tissue sections were deparaffinised and rehydrated by washing in Xylene for  
355 5mins, followed by sequential washes in 100%, 96% and 70% ethanol respectively prior to  
356 antigen retrieval in sodium citrate buffer (10mM, pH6.0). Sections were washed in TBS-T  
357 and blocked in 3% goat serum in TBS for 1hr at RT, and then stained with rabbit polyclonal  
358 anti-CENPF antibody (Abcam, ab5:1:50), or a rabbit isotype control IgG at equivalent  
359 concentrations to primary antibody (Abcam, ab172730: 1:33). Following incubation, the  
360 section were washed in TBS-T and incubated with HRP anti-rabbit secondary antibody  
361 (Sigma, A0545: 1:500). Detection was carried out using 3,3'Diaminobenzidine (DAB)  
362 (Vector Laboratories, SK-4105) and a haematoxylin counter-stain applied, before being  
363 rehydrated and mounted in Pertex mounting media. An Axioscan slidescanner was used to  
364 image the sections, using Zen software. All settings for the Axioscan and software were  
365 optimised and then maintained for each set of experiments, so that sections can be compared  
366 accurately.

367 Analysis of staining was performed on QuPath 0.1.2 software. Positive cell detection  
368 was utilised, which automatically detects cell nuclei, and whole cell positive CENPF staining  
369 was determined by setting a threshold for CENPF detection using positive and IgG controls  
370 to confirm threshold limits. The region of interest (medial layer) was selected along the  
371 whole vein section and the number of CENPF-positive cells expressed as a percentage of  
372 total cells in that region. For each vein, at least 500 cells per section were counted, to give an  
373 accurate percentage reading.

374

### 375 **Statistical Analysis**

376 Statistical analysis was performed according to figure legends. Data are expressed as  
377 mean  $\pm$  SEM. For samples sizes  $\geq 5$  normal distribution was determined by Shapiro-Wilk test  
378 followed by student t test or ANOVA. For each biological replicate, control and test  
379 conditions were set up and accordingly analysed as pairs. Normal distribution cannot be  
380 determined on small samples sizes and samples with  $n < 5$  were assumed to be not normally  
381 distributed and subjected to Iman and Conover non parametric ranking followed by students t  
382 test or ANOVA. Statistical significance is denoted by a P value of less than 0.05 (Graph Pad  
383 Prism version 5.0).

384

### 385 **Graphical Image Construction**

386 Graphical images were generated using basic components from ElSevier Medical Art.

387



388 **Supplemental Methods References**

- 389 1. Ballantyne MD, Pinel K, Dakin R, Vesey AT, Diver L, Mackenzie R, Garcia R,  
390 Welsh P, Sattar N, Hamilton G, Joshi N, Dweck MR, Miano JM, McBride MW, Newby DE,  
391 McDonald RA and Baker AH. Smooth Muscle Enriched Long Noncoding RNA (SMILR)  
392 Regulates Cell Proliferation. *Circulation*. 2016;133:2050-65.
- 393 2. Li H. A statistical framework for SNP calling, mutation discovery, association  
394 mapping and population genetical parameter estimation from sequencing data.  
395 *Bioinformatics*. 2011;27:2987-2993.
- 396 3. Love MI, Huber W and Anders S. Moderated estimation of fold change and  
397 dispersion for RNA-seq data with DESeq2. *Genome Biology*. 2014;15:550.
- 398 4. Robinson MD, McCarthy DJ and Smyth GK. edgeR: a Bioconductor package for  
399 differential expression analysis of digital gene expression data. *Bioinformatics*. 2010;26:139-  
400 140.
- 401 5. Rajkumar AP, Qvist P, Lazarus R, Lescai F, Ju J, Nyegaard M, Mors O, Børghlum AD,  
402 Li Q and Christensen JH. Experimental validation of methods for differential gene expression  
403 analysis and sample pooling in RNA-seq. *BMC Genomics*. 2015;16:548.
- 404 6. Rahnenfuhrer AAaJ. topGO: Enrichment Analysis for Gene Ontology. *R package*  
405 *version 22702016*. 2016.
- 406 7. Livak KJ and Schmittgen TD. Analysis of Relative Gene Expression Data Using  
407 Real-Time Quantitative PCR and the  $2^{-\Delta\Delta CT}$  Method. *Methods*. 2001;25:402-408.
- 408 8. Terai G, Iwakiri J, Kameda T, Hamada M and Asai K. Comprehensive prediction of  
409 lncRNA–RNA interactions in human transcriptome. *BMC Genomics*. 2016;17:12.
- 410 9. Joshi NV, Vesey AT, Williams MC, Shah ASV, Calvert PA, Craighead FHM, Yeoh  
411 SE, Wallace W, Salter D, Fletcher AM, van Beek EJR, Flapan AD, Uren NG, Behan MWH,  
412 Cruden NLM, Mills NL, Fox KAA, Rudd JHF, Dweck MR and Newby DE. 18F-fluoride  
413 positron emission tomography for identification of ruptured and high-risk coronary  
414 atherosclerotic plaques: a prospective clinical trial. *The Lancet*. 2014;383:705-713.

415

416

417

418

419

420

421

422

423

424

425

426

427

428

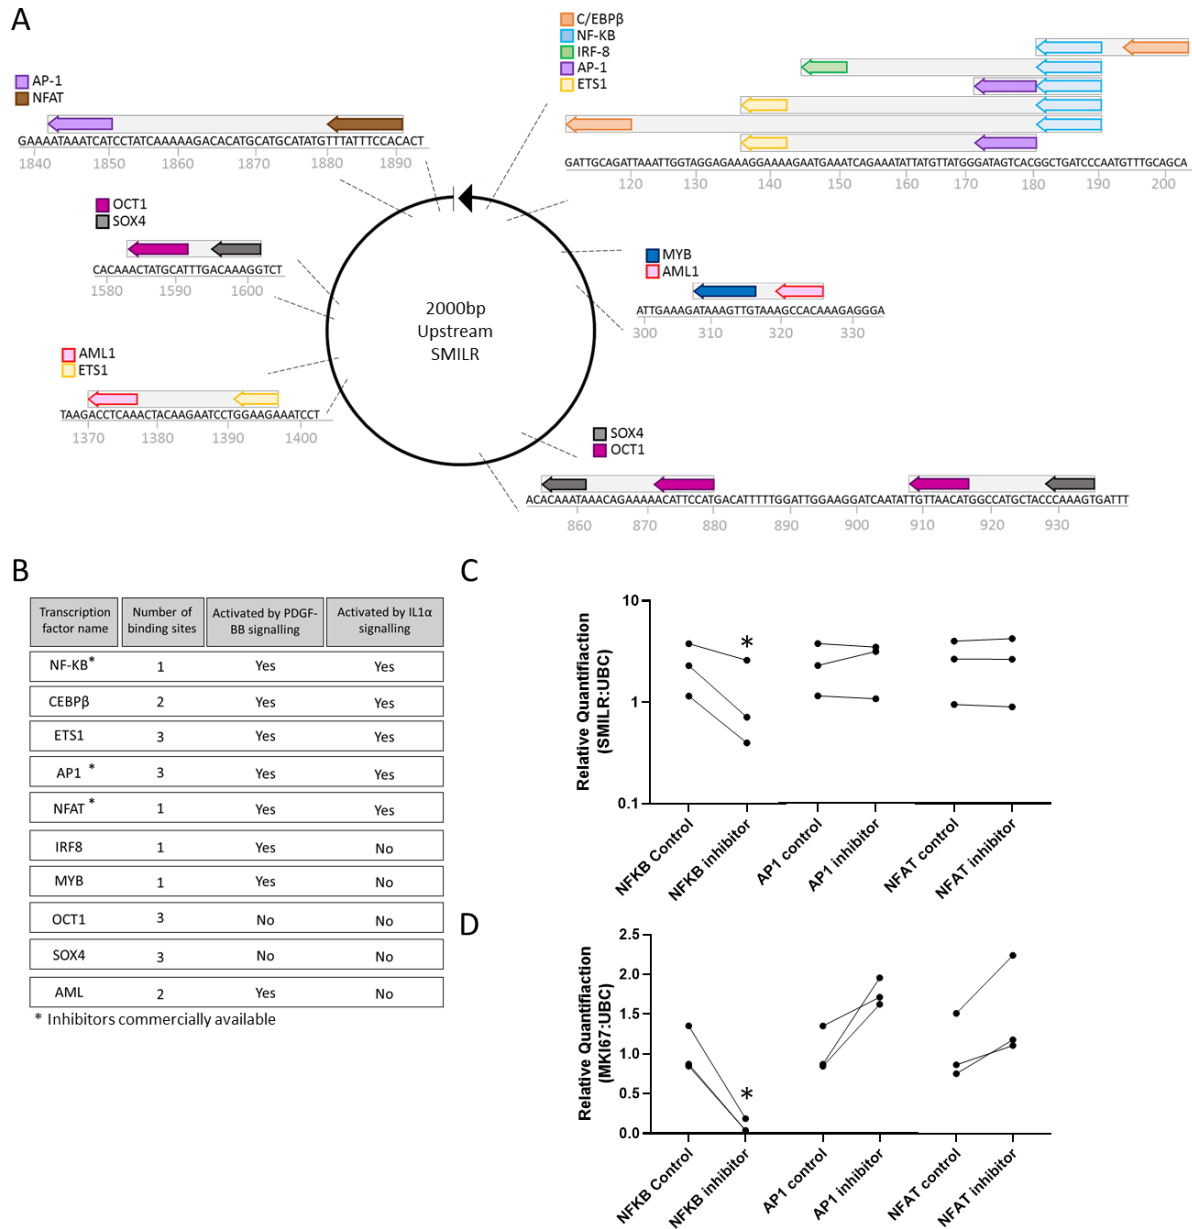

429

430 **Supplemental Figure I: Characterisation of SMILR promoter region.** (A) Predicted  
 431 transcription factor binding sites within the 2000bp sequence upstream of SMILR's  
 432 transcription start site. (B) Transcription factors previously shown to be activated by IL1 $\alpha$   
 433 and/or PDGF-BB. \* indicates commercially available inhibitors. (C) Effects of NF-KB, AP1,  
 434 and NFAT inhibition on SMILR expression. \* =  $p < 0.05$ , nonparametric Iman and Conover  
 435 ranked analysis and students t-test, each line represents a biological replicate pair (n=3). (D)  
 436 Effects of NF-KB, AP1, and NFAT inhibition on MKI67 expression. \* =  $p < 0.05$   
 437 nonparametric Iman and Conover ranked analysis and students t-test, each line represents a  
 438 biological replicate pair (n=3).

439

440

441

442

443

444

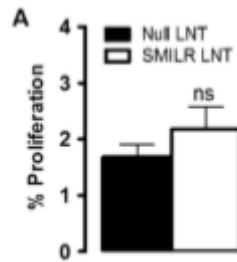

445

446

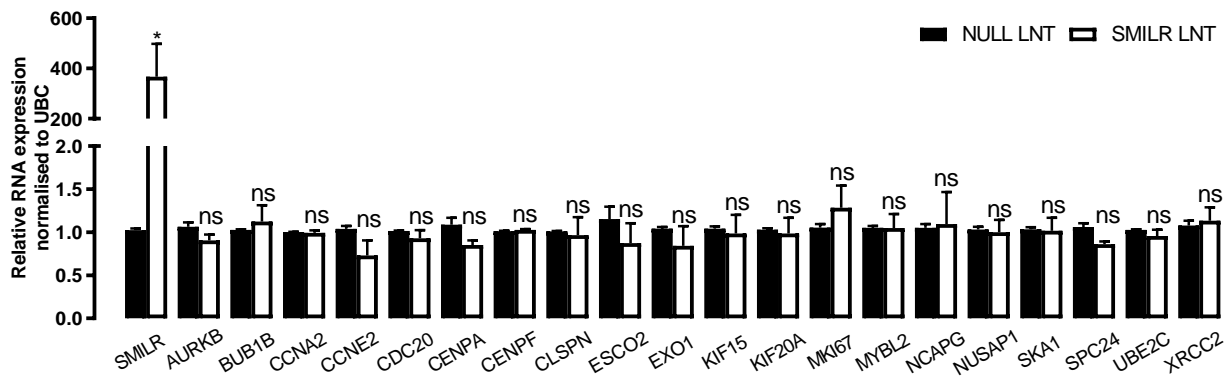

447

448 **Supplemental Figure II. Effects of SMILR overexpression on quiesced vSMCs. (A)**

449 Percentage proliferation of quiesced vSMCs of Null LNT versus SMILR LNT by EdU  
450 incorporation and FACs. ns = not significant by paired t-test of n = 3 biological replicates.

451 (B) Bar charts of the relative quantification of 20 cell cycle associated genes between Null  
452 LNT versus under quiesced conditions. ns = not significant, \* =  $p < 0.05$  by nonparametric

453 Iman and Conover ranked analysis and students t-test, n = 3 biological replicates.

454

455

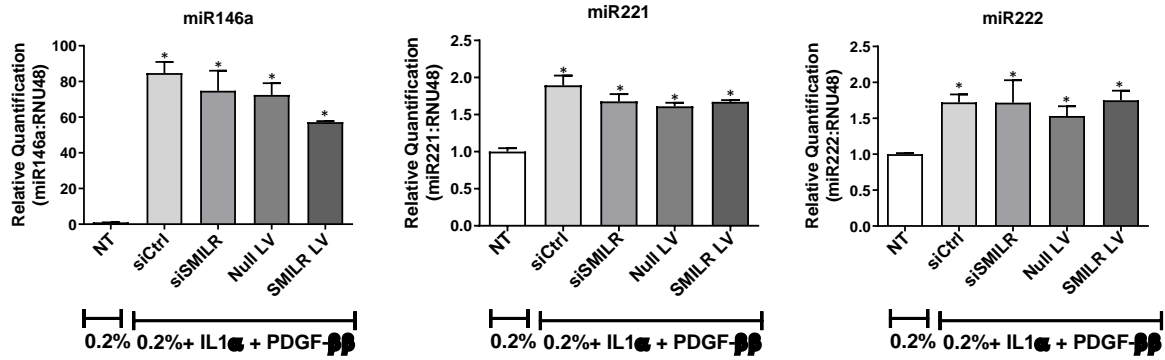

456

457

458

459

460 **Supplemental Figure III. IL1-PDGF induced expression of mir146a, mir221, and**  
 461 **mir222.**

462 Analysis of miR-146a, miR-221 and miR-222 expression normalised to RNU48 via qRT-  
 463 PCR of samples used for RNAseq analysis from one biological replicate in a technical  
 464 triplicate.

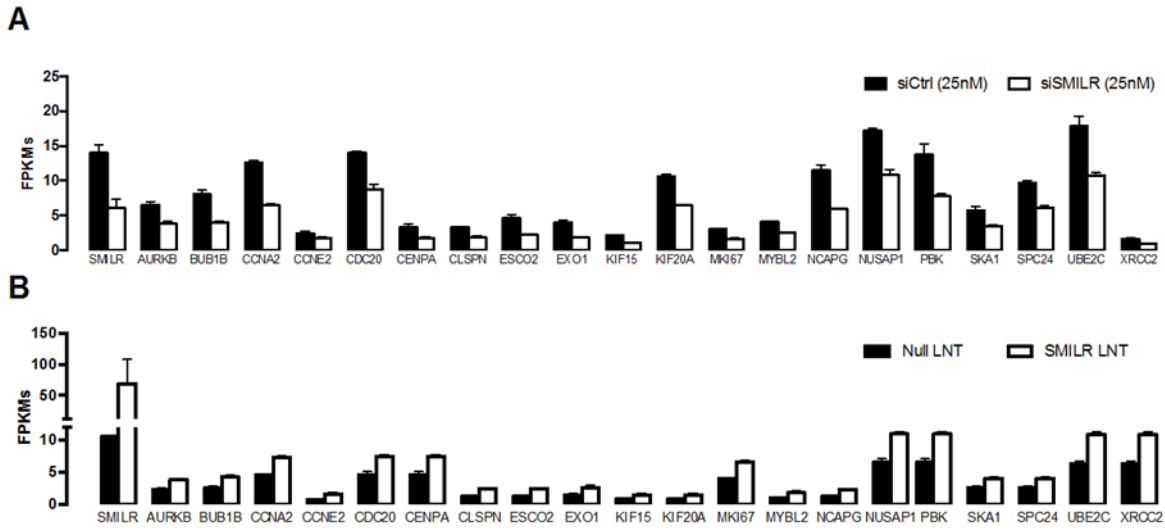

465

466

467

468

**Supplemental Figure IV.** FPKM values for the top 20 dysregulated cell division associated genes with (A) siControl (siCtrl) and siSMILR and (B) Control lentivirus (Null LNT) and SMILR lentivirus (SMILR LNT) across 3 technical replicates of one biological replicate.

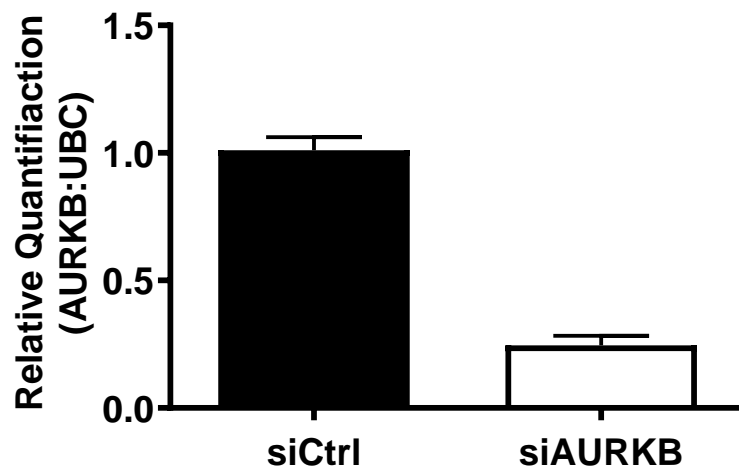

469

470

471 **Supplemental Figure V.** Relative quantification of AURKB knockdown by qRT-PCR. n = 3  
472 biological replicates.

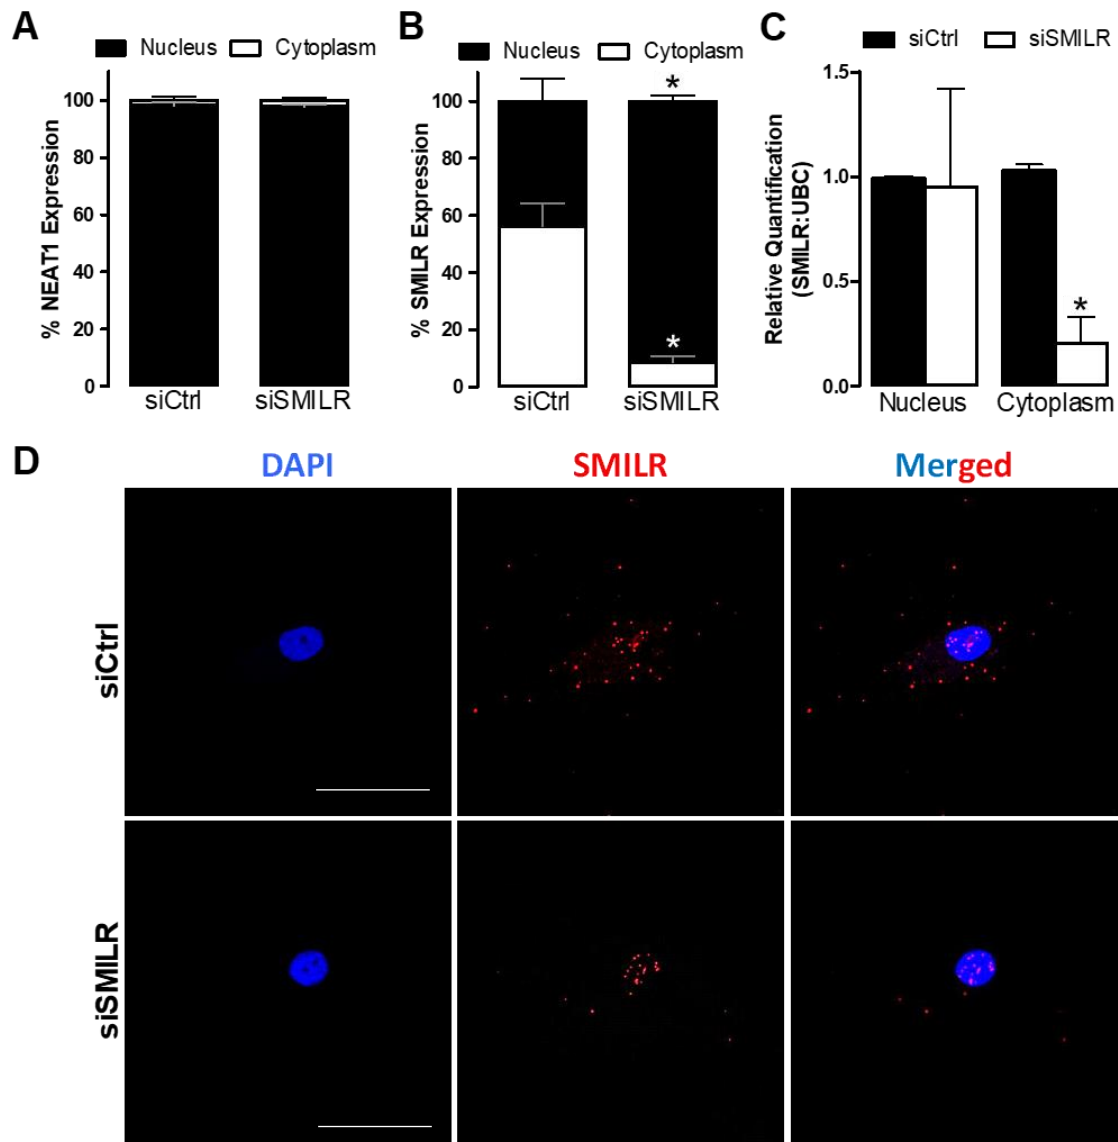

473

474 **Supplemental Figure VI. Subcellular localisation of SMILR following siRNA induced**  
 475 **knockdown.** (A) qRT-PCR of NEAT1, a nuclear lncRNA, expression showing the clean  
 476 separation of nuclear and cytoplasmic fractions of vSMCs, n = 3 biological replicates. (B)  
 477 qRT-PCR showing the percentage changes in localisation of SMILR following siRNA  
 478 induced knockdown. \* =  $p < 0.05$ , n = 3 biological replicates. (C) qRT-PCR showing the  
 479 relative quantification of SMILR knockdown in the nuclear and cytoplasmic fraction, \* =  $p <$   
 480  $0.05$ , n = 3 biological replicates. All graphs via Iman and Conover non parametric analysis  
 481 followed by students t test. (D) RNA-FISH showing SMILR (red) distribution in vSMCs  
 482 stained with DAPI (blue) under siCtrl and siSMILR conditions using fluorescent microscopy  
 483 at 40x magnification. Scale bars at 50  $\mu$ m.





488  
489  
490  
491  
492  
493  
494  
495  
496  
497  
498  
499  
500  
501  
502  
503  
504  
505  
506  
507  
508  
509  
510  
511  
512  
513  
514  
515  
516  
517  
518  
519

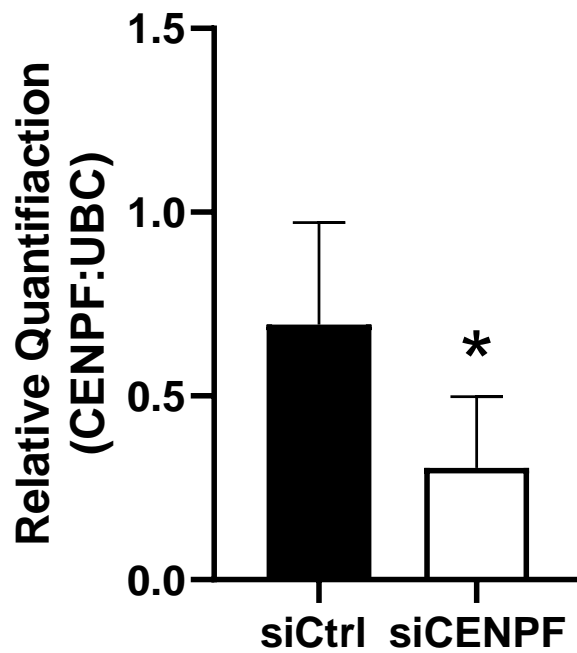

**Supplemental Figure VIII: Confirmation of CENPF knockdown.** qRT-PCR confirming CENPF knockdown using dsRNA (25nM). Data analysed via non parametric Iman and Conover ranked analysis followed by students t test \* =  $p < 0.05$  (n=4).

520

521

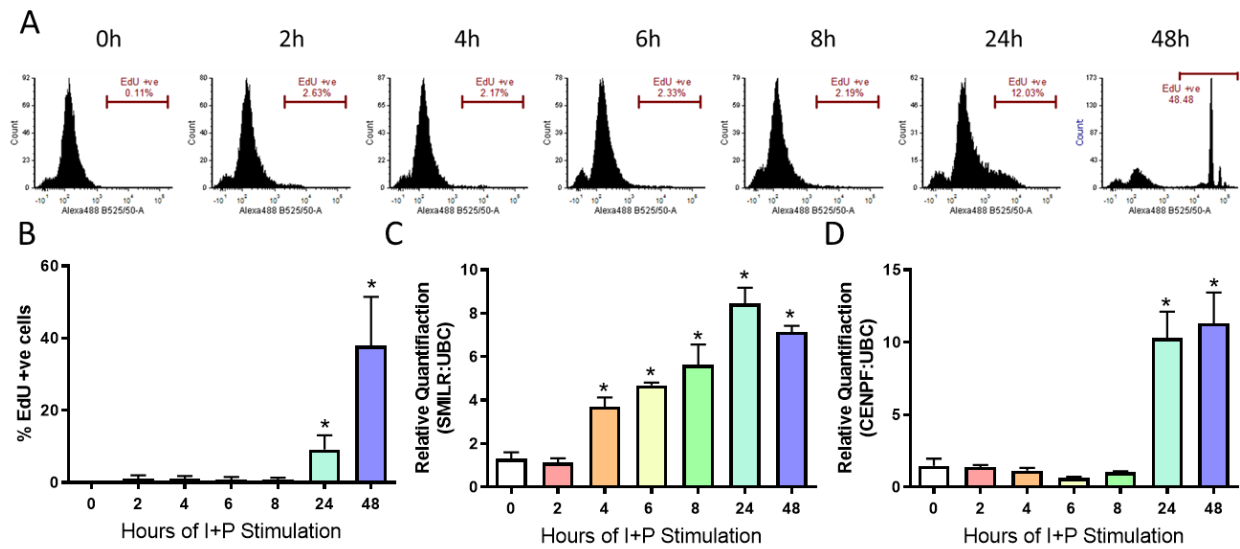

522

523

524 **Supplemental Figure IX: Time course studies on IL1-PDGF stimulated HSVSMCs.** (A)

525 Representative FACs histogram plots showing % of EdU +ve cells at 0, 2, 4, 6, 8, 24, 48

526 hours post IL1-PDGF stimulation. (B) Bar chart representing the average of % EdU +ve cells

527 with time, \* =  $p < 0.05$ ,  $n = 3$  biological replicates. (C) Bar chart representing the average

528 expression of SMILR by qRT-PCR with time, \* =  $p < 0.05$ ,  $n = 3$  biological replicates. (D)

529 Bar chart representing the average expression of CENPF by qRT-PCR with time, \* =  $p <$

530 0.05,  $n = 3$  biological replicates. All graphs analysed via Iman and Conover ranked analysis

531 followed by one way ANOVA.

532

533

534

535

536

537

538

539

540

541

542

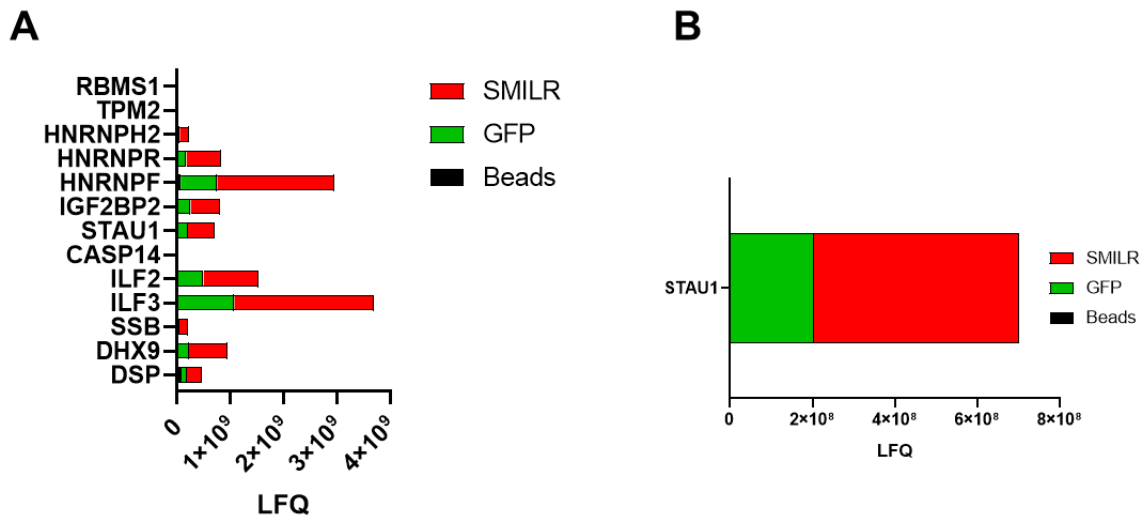

543

544

545

546

547

548

**Supplemental Figure X: Biotinylated SMILR pulldown.** A) Confirmation results of biotinylated SMILR pulldown with additional biotinylated GFP. Results from mass spectrometry analysis. LFQ (label free quantification) B) Levels of stau1 bound to beads, GFP or SMILR.

A

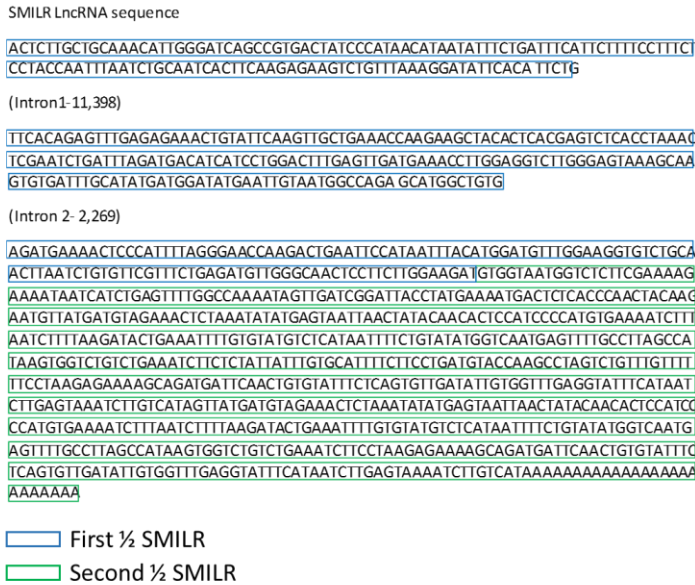

B

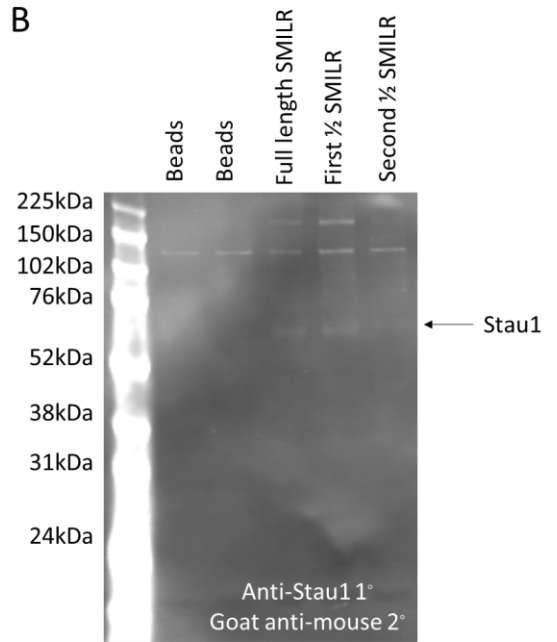

549

550

551 **Supplemental Figure XI: Interaction of full length and truncated SMILR fragments**  
 552 **with Stau1 protein.** A) Schematic representation of the SMILR fragments used in this study.  
 553 First ½ SMILR is denoted as blue and second ½ denoted as green boxes. Full length  
 554 represents the full sequence of SMILR. B) Biotinylated constructs, denoted in a, or bead only  
 555 controls were utilised as bait and incubated with protein lysates. Streptavidin beads were  
 556 utilised to capture bound proteins and washed with wash buffer to remove non-specific  
 557 interactions. Captured proteins were resolved by SDS-PAGE followed by immunoblotting  
 558 with Stau1 primary antibody. Arrowhead represents expected size of Stau1 protein (55kDa).

559

560

561

562

563

564

565

566

567

568

569

570

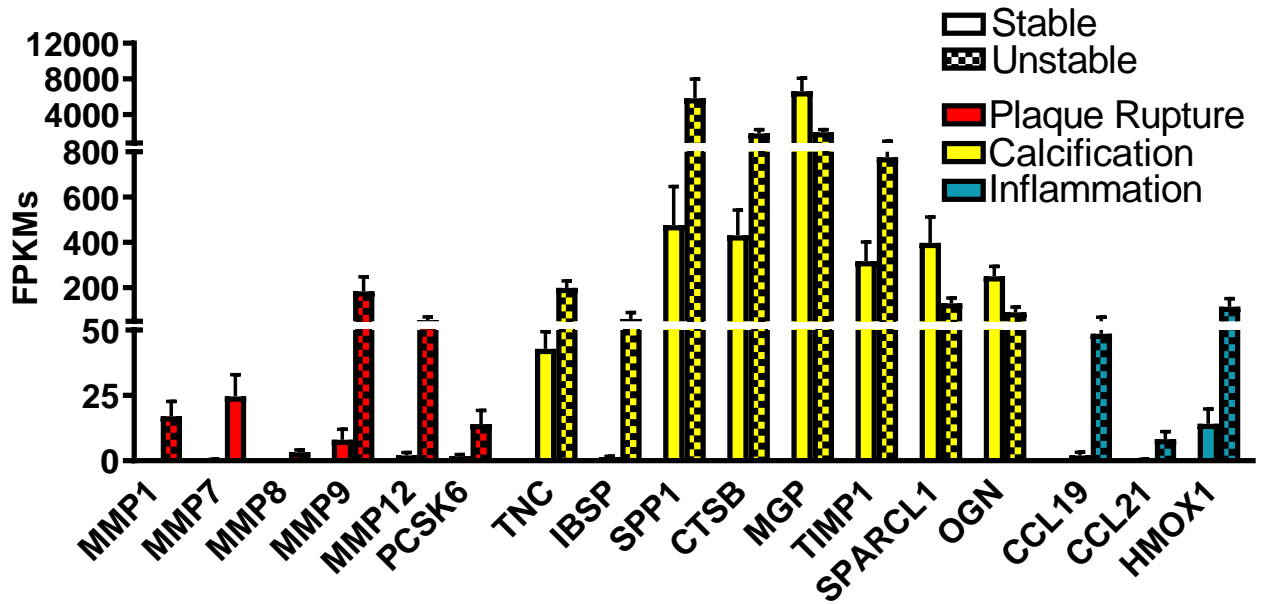

571

572 Supplemental Figure XII: Relative FPKMs of markers of plaque rupture, calcification,  
 573 and inflammation in the stable versus unstable plaques.

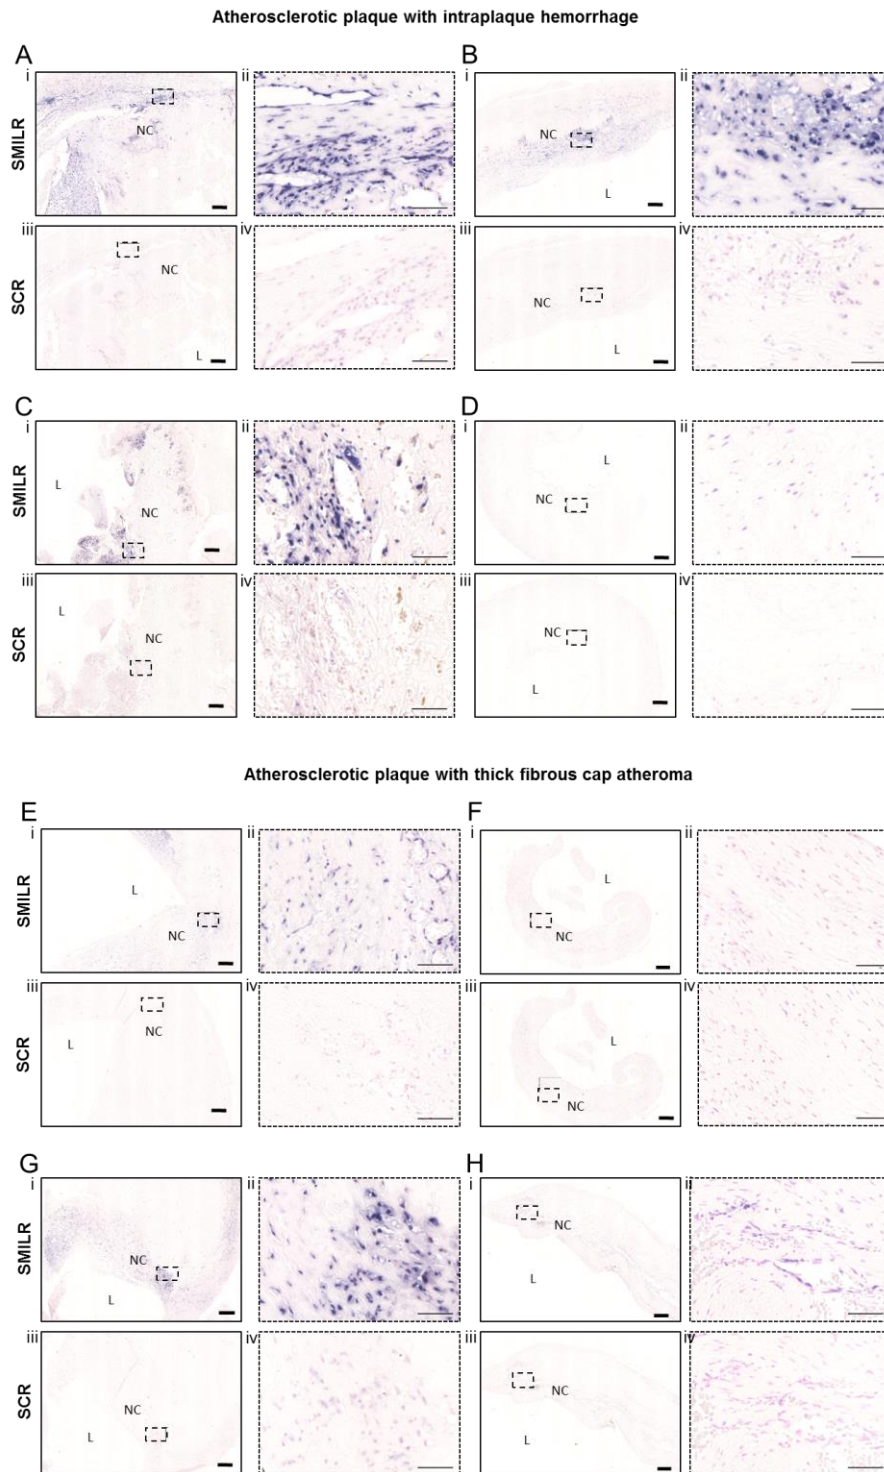

574

575 **Supplemental Figure XIII. Localization of SMILR in human atherosclerotic plaques.**

576 Representative images of in situ detection of SMILR in 4 independent biological replicates of  
577 plaques in the carotid artery derived from symptomatic patients at carotid endarterectomy.

578 SMILR is present in 4 of 5 plaques with intraplaque haemorrhaging using NBT/BCIP

579 (purple), and present in 3 of 5 plaques with thick fibrous cap atheroma in varying intensity (i,  
580 ii), while signal is absent after in situ hybridization with a scrambled (SCR) probe (iii, iv).

581 Nuclei are stained with fast red. L, indicates arterial lumen; NC, lipid core; scale bar

582 represents 200  $\mu$ m.

583  
584  
585  
586  
587  
588  
589  
590  
591

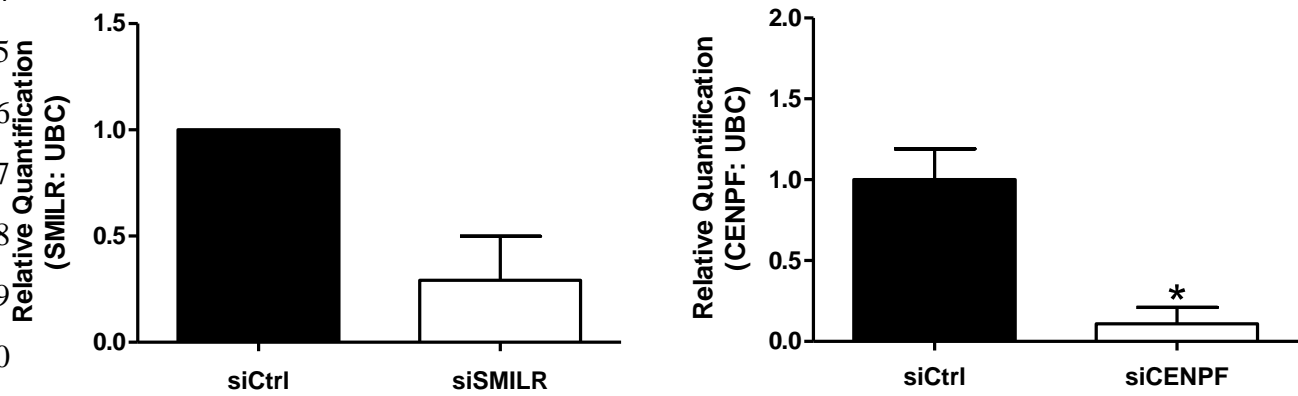

592 **Supplemental Figure XIV.** qRT-PCR confirming knockdown of (A) SMILR and (B)  
593 CENPF in CASMCs. Iman and Conover non parametric ranked analysis followed by students  
594 t test\* =  $p < 0.05$  by paired t-test.  $n = 3$  biological replicates.

595  
596  
597  
598  
599  
600  
601  
602  
603  
604  
605  
606  
607

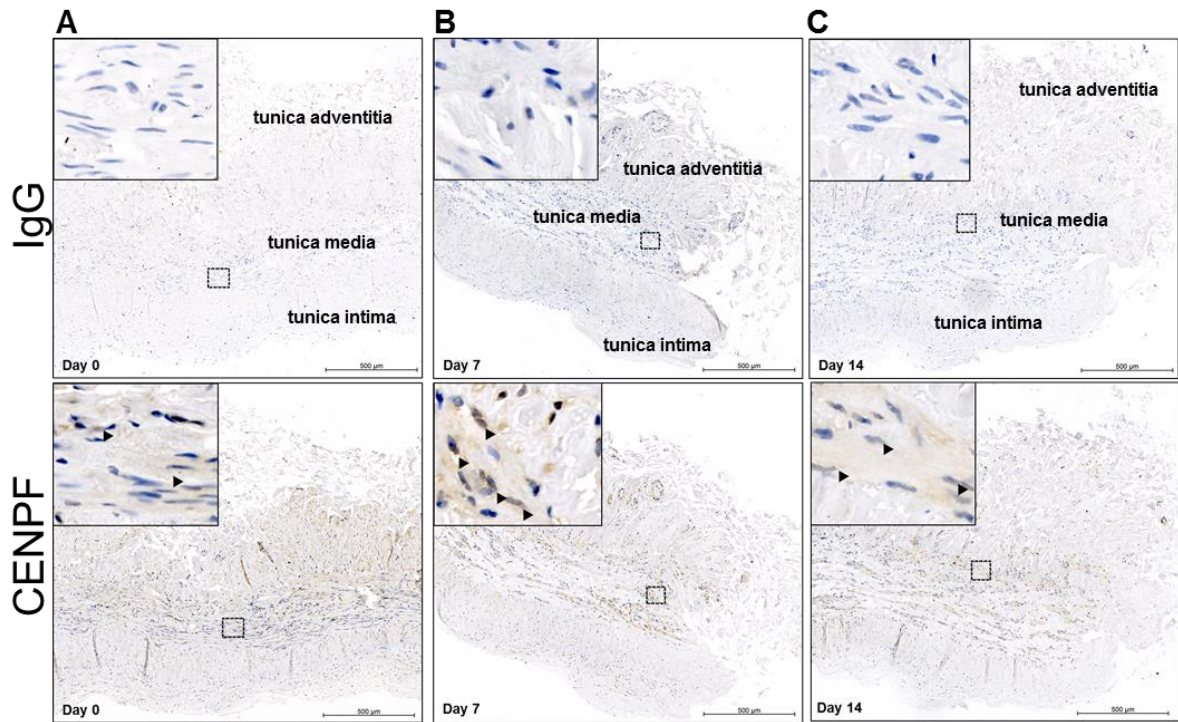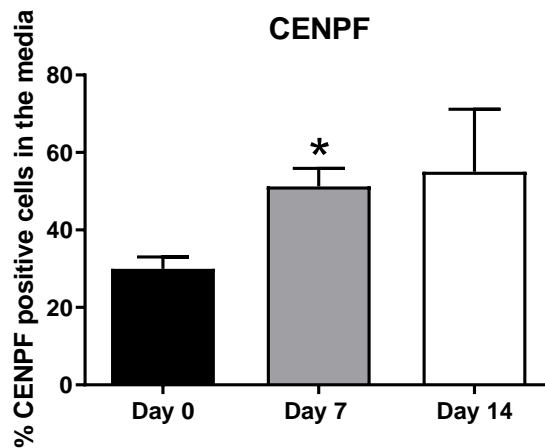

608  
609  
610  
611  
612  
613  
614

**Supplemental Figure XV. CENPF protein levels are increased in the medial layer of cultured HSV.** Representative images of medial CENPF protein levels at (A) day 0 and (B) day 7. Top panels corresponds to IgG negative control while bottom panels corresponds to CENPF; black arrows mark CENPF positive cells; scale bar is equal to 500  $\mu$ m. (C) Quantification of medial CENPF IHC signal expressed as a percentage of CENPF positive cells. Iman and Conover non parametric ranked analysis \* =  $p < 0.05$ .



615

616

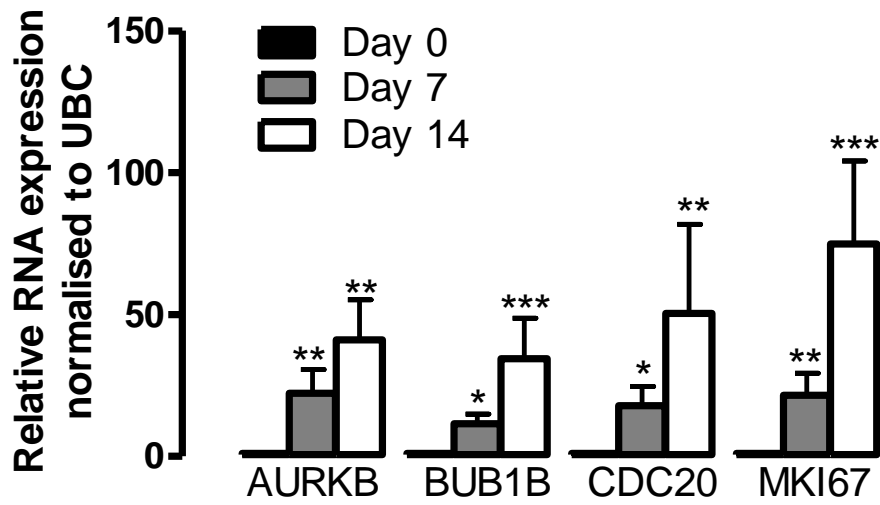

617

618

619 **Supplemental Figure XVI:** The relative quantification of (D) *SMILR*, (E) *CENPF*, and (F),  
 620 other *SMILR* downstream targets within the cell cycle network, at day 0, 7 and 14. \* =  $p <$   
 621 0.05, Iman and Conover ranked non parametric analysis followed by students t test (n=3).

622

623

624

625

626

627

628

629

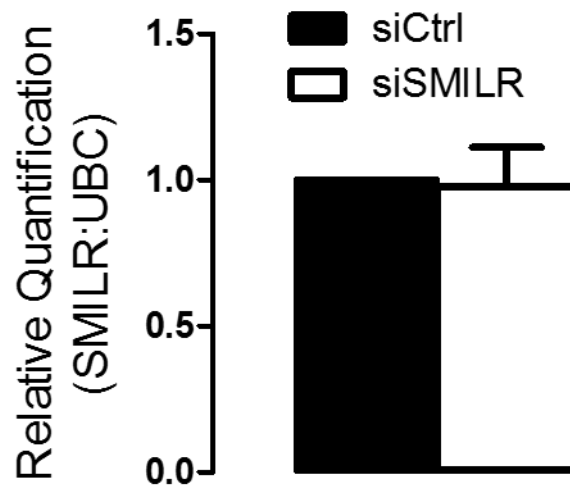

630

631

632

633

634 **Supplementary Figure XVII.** The loss of siRNA effects on SMILR knockdown at day 14 of  
635 intervention, n = 2 biological replicates.

636

637

| Ranking | Gene         | Average FPKM CTRL | LogFC SMILR overexp | FDR SMILR overexp | LogFC SMILR depletion | FDR SMILR depletion | logFC IL+PDGF | FDR IL+PDGF |
|---------|--------------|-------------------|---------------------|-------------------|-----------------------|---------------------|---------------|-------------|
| 1       | TTN          | 0.13              | -                   | -                 | -                     | -                   | -             | -           |
| 2       | KCNQ1OT1     | 0.65              | -                   | -                 | -                     | -                   | -             | -           |
| 3       | MUC16        | 0.00              | -                   | -                 | -                     | -                   | -             | -           |
| 4       | TSIX         | 0.04              | -                   | -                 | -                     | -                   | -             | -           |
| 5       | FSIP2        | 2.00              | 0.40                | 5.64E-02          | -0.35                 | 6.11E-02            | -             | -           |
| 6       | DST          | 84.46             | 0.11                | 7.19E-01          | 0.00                  | 1.00E+00            | -             | -           |
| 7       | NEB          | 0.21              | -                   | -                 | -                     | -                   | -             | -           |
| 8       | GRIN2B       | 0.01              | -                   | -                 | -                     | -                   | -             | -           |
| 9       | SYNE1        | 26.80             | -0.02               | 9.40E-01          | -0.01                 | 9.46E-01            | -             | -           |
| 10      | <b>SYNE2</b> | 1.06              | 0.47                | 5.33E-02          | -0.76                 | 1.68E-08            | -1.43482      | 0.005296    |
| 11      | MACF1        | 82.14             | 0.12                | 3.82E-01          | 0.04                  | 7.40E-01            | -             | -           |
| 12      | SLC8A1       | 7.34              | 0.05                | 8.05E-01          | -0.16                 | 6.40E-02            | -             | -           |
| 13      | DNAJC10      | 90.61             | 0.01                | 9.51E-01          | 0.14                  | 2.00E-02            | -             | -           |
| 14      | CNKSR3       | 1.78              | 0.09                | 8.03E-01          | 0.03                  | 9.29E-01            | -             | -           |
| 15      | RPAP2        | 7.15              | 0.13                | 3.06E-01          | -0.25                 | 2.66E-03            | -             | -           |
| 16      | DNAH14       | 6.86              | -0.06               | 8.96E-01          | 0.03                  | 9.47E-01            | -             | -           |
| 17      | XKR4         | 0.01              | -                   | -                 | -                     | -                   | -             | -           |
| 18      | NCKAP1       | 31.49             | 0.12                | 1.41E-01          | -0.38                 | 1.64E-12            | -             | -           |
| 19      | PCLO         | 0.08              | -                   | -                 | -                     | -                   | -             | -           |
| 20      | AKAP9        | 7.80              | 0.11                | 4.35E-01          | 0.02                  | 9.23E-01            | -             | -           |
| 21      | CEP350       | 13.70             | 0.07                | 5.80E-01          | -0.10                 | 1.56E-01            | -             | -           |
| 22      | ABI2         | 11.46             | 0.06                | 6.94E-01          | 0.08                  | 3.59E-01            | -             | -           |
| 23      | KIAA1109     | 11.83             | 0.07                | 7.26E-01          | 0.16                  | 1.17E-02            | -             | -           |
| 24      | SACS         | 15.60             | 0.22                | 1.47E-03          | -0.17                 | 6.34E-02            | -             | -           |
| 25      | AGO3         | 6.82              | 0.18                | 7.86E-02          | 0.15                  | 7.81E-02            | -             | -           |
| 26      | XIRP2        | 0.02              | -                   | -                 | -                     | -                   | -             | -           |
| 27      | ABCA13       | 0.15              | -                   | -                 | -                     | -                   | -             | -           |
| 28      | BDP1         | 6.11              | 0.07                | 5.99E-01          | 0.02                  | 9.19E-01            | -             | -           |
| 29      | VPS13A       | 4.97              | 0.07                | 7.14E-01          | -0.25                 | 1.23E-03            | -             | -           |
| 30      | GUCY1A2      | 0.75              | -                   | -                 | -                     | -                   | -             | -           |
| 31      | CMYA5        | 0.07              | -                   | -                 | -                     | -                   | -             | -           |
| 32      | RIF1         | 9.05              | 0.14                | 1.30E-01          | 0.07                  | 5.66E-01            | -             | -           |
| 33      | ZBTB37       | 3.17              | 0.14                | 3.94E-01          | 0.08                  | 6.15E-01            | -             | -           |
| 34      | DLX6-AS1     | 0.02              | -                   | -                 | -                     | -                   | -             | -           |
| 35      | GPR98        | other name        |                     |                   |                       |                     | -             | -           |
| 36      | STX7         | 19.63             | -0.03               | 8.52E-01          | 0.11                  | 1.39E-01            |               |             |
| 37      | HMCN1        | 16.20             | 0.17                | 2.51E-01          | 0.42                  | 1.82E-14            |               |             |
| 38      | LPP          | 9.38              | 0.22                | 2.26E-01          | -0.57                 | 4.01E-08            |               |             |
| 39      | DNAH8        | 0.00              | -                   | -                 | -                     | -                   |               |             |
| 40      | GOLGB1       | 15.91             | -0.06               | 7.33E-01          | 0.07                  | 3.09E-01            |               |             |
| 41      | <b>CENPF</b> | 5.39              | 0.76                | 8.25E-25          | -0.63                 | 1.47E-31            | 3.258644      | 6.82E-06    |
| 42      | KCNJ6        | 0.00              | -                   | -                 | -                     | -                   |               |             |
| 43      | <b>ANK3</b>  | 2.58              | 0.41                | 1.14E-02          | 0.94                  | 2.17E-10            | -1.01659      | 0.503041    |
| 44      | DMD          | 4.73              | -0.11               | 4.24E-01          | -0.25                 | 2.47E-03            |               |             |
| 45      | BRWD1        | 8.69              | 0.12                | 2.16E-01          | 0.02                  | 9.12E-01            |               |             |
| 46      | FAT3         | 0.19              | -                   | -                 | -                     | -                   |               |             |
| 47      | <b>NEAT1</b> | 13.91             | -0.09               | 8.10E-01          | -1.21                 | 2.02E-10            | -0.29834      | 0.852367    |
| 48      | PPIP5K2      | 24.01             | 0.13                | 1.19E-01          | 0.08                  | 2.48E-01            |               |             |
| 49      | <b>CENPE</b> | 3.14              | 0.63                | 1.55E-10          | -0.43                 | 1.58E-05            | 2.317095      | 0.000171    |
| 50      | KMT2C        | 6.02              | 0.15                | 1.33E-01          | -0.05                 | 5.74E-01            |               |             |

|     |         |       |       |          |       |          |          |          |
|-----|---------|-------|-------|----------|-------|----------|----------|----------|
| 51  | DGKH    | 2.44  | 0.15  | 3.00E-01 | 0.08  | 6.90E-01 |          |          |
| 52  | XIST    | 0.03  | -     | -        | -     | -        |          |          |
| 53  | DYNC2H1 | 8.28  | 0.17  | 4.51E-02 | -0.16 | 1.28E-01 |          |          |
| 54  | ATRX    | 22.59 | 0.06  | 6.35E-01 | 0.06  | 4.58E-01 |          |          |
| 55  | BOD1L1  | 7.29  | 0.07  | 6.17E-01 | 0.07  | 3.65E-01 |          |          |
| 56  | RYR2    | 0.00  | -     | -        | -     | -        |          |          |
| 57  | USH2A   | 0.01  | -     | -        | -     | -        |          |          |
| 58  | DNAH5   | 0.75  | -     | -        | -     | -        |          |          |
| 59  | HOOK3   | 8.90  | 0.06  | 6.55E-01 | -0.18 | 1.02E-02 |          |          |
| 60  | DNAH11  | 1.11  | -0.27 | 6.69E-01 | -0.17 | 7.63E-01 |          |          |
| 61  | TNRC6B  | 5.00  | 0.16  | 1.10E-01 | -0.04 | 7.62E-01 |          |          |
| 62  | ANKRD12 | 11.84 | -0.02 | 9.54E-01 | -0.08 | 4.38E-01 |          |          |
| 63  | ONECUT2 | 0.00  | -     | -        | -     | -        |          |          |
| 64  | AHNAK   | 76.66 | 0.16  | 3.57E-01 | 0.15  | 8.88E-02 |          |          |
| 65  | ITSN1   | 14.41 | 0.11  | 2.18E-01 | 0.27  | 7.23E-07 |          |          |
| 66  | FZD3    | 0.41  | -     | -        | -     | -        |          |          |
| 67  | MDN1    | 3.97  | 0.07  | 5.41E-01 | -0.05 | 5.21E-01 |          |          |
| 68  | ANK2    | 20.94 | 0.03  | 8.14E-01 | 0.39  | 3.25E-11 |          |          |
| 69  | LRP1B   | 0.01  | -     | -        | -     | -        |          |          |
| 70  | ZNF704  | 0.23  | -     | -        | -     | -        |          |          |
| 71  | C5orf42 | 4.56  | 0.13  | 2.97E-01 | 0.04  | 7.68E-01 |          |          |
| 72  | CEP290  | 7.95  | 0.05  | 7.76E-01 | -0.02 | 8.97E-01 |          |          |
| 73  | VPS13C  | 14.22 | -0.04 | 7.65E-01 | 0.12  | 1.08E-01 |          |          |
| 74  | KMT2A   | 4.53  | 0.17  | 8.48E-02 | 0.02  | 9.08E-01 |          |          |
| 75  | NFAT5   | 3.63  | 0.06  | 8.76E-01 | -0.05 | 7.12E-01 |          |          |
| 76  | POU2F1  | 1.09  | -0.03 | 9.48E-01 | -0.01 | 9.89E-01 |          |          |
| 77  | RNF213  | 14.07 | -0.18 | 5.24E-01 | 0.06  | 5.10E-01 |          |          |
| 78  | PKHD1   | 0.00  | -     | -        | -     | -        |          |          |
| 79  | MYCBP2  | 19.30 | 0.05  | 8.68E-01 | 0.07  | 4.19E-01 |          |          |
| 80  | FAT4    | 1.63  | 0.08  | 7.08E-01 | -0.09 | 3.74E-01 |          |          |
| 81  | DGKI    | 1.74  | 0.00  | 1.00E+00 | -0.40 | 6.03E-04 |          |          |
| 82  | UBN2    | 1.39  | 0.22  | 1.86E-01 | -0.13 | 4.36E-01 |          |          |
| 83  | ATM     | 23.18 | 0.09  | 4.48E-01 | 0.09  | 2.52E-01 |          |          |
| 84  | SUGT1   | 39.64 | 0.06  | 6.42E-01 | -0.07 | 3.07E-01 |          |          |
| 85  | BIRC6   | 21.60 | 0.03  | 8.03E-01 | -0.04 | 7.17E-01 |          |          |
| 86  | GOLGA4  | 24.70 | 0.10  | 2.40E-01 | -0.05 | 5.93E-01 |          |          |
| 87  | APOB    | 0.00  | -     | -        | -     | -        |          |          |
| 88  | LYST    | 7.70  | -0.06 | 6.20E-01 | -0.46 | 3.24E-16 |          |          |
| 89  | BRCA2   | 2.32  | 0.27  | 1.27E-02 | -0.11 | 6.03E-01 |          |          |
| 90  | KCTD16  | 0.75  | -     | -        | -     | -        |          |          |
| 91  | APC     | 13.51 | 0.14  | 3.46E-01 | 0.24  | 4.91E-05 |          |          |
| 92  | RANBP2  | 17.82 | 0.06  | 6.20E-01 | 0.06  | 4.59E-01 |          |          |
| 93  | CHD9    | 13.46 | -0.03 | 8.31E-01 | 0.12  | 1.01E-01 |          |          |
| 94  | CAMK4   | 0.34  | -     | -        | -     | -        |          |          |
| 95  | MMP16   | 7.61  | 0.25  | 6.00E-03 | 0.31  | 1.53E-03 |          |          |
| 96  | HERC1   | 13.48 | 0.09  | 3.34E-01 | 0.05  | 5.68E-01 |          |          |
| 97  | INO80D  | 1.73  | 0.14  | 3.04E-01 | -0.15 | 5.96E-01 |          |          |
| 98  | PDK1    | 5.29  | -0.04 | 8.97E-01 | 0.22  | 2.68E-02 |          |          |
| 99  | CCDC88A | 10.34 | 0.18  | 1.15E-02 | 0.07  | 4.03E-01 |          |          |
| 100 | ASPM    | 3.88  | 0.81  | 1.73E-30 | -0.67 | 4.57E-14 | 0.784365 | 0.489931 |

639

640

641 **Supplemental Table I:** Ranking based on SumEnergy of the top100 predicted SMILR-  
642 interacting RNAs.

643

644

|             | Forward (5'-3')                                                   | Reverse (5'-3')                                                    |
|-------------|-------------------------------------------------------------------|--------------------------------------------------------------------|
| T7<br>SMILR | GATACCTAATACGACTCACTATA<br>GGGGATACCCACCATGGACTCT<br>TGCTGCAAACAT | TTTTTTTTTTTTTTTTTTTTTTTTTTTTT<br>TTTTTTAATGACAAGATTTTACTC<br>AAGAT |
| T7 GFP      | GATACCTAATACGACTCACTATA<br>GGGGATACCCACCATGGATGGT<br>GAGCAAGGGCGA | TTTTTTTTTTTTTTTTTTTTTTTTTTTTT<br>TTTTTTACTTGTACAGCTCGTCCA<br>TGC   |
| SMILR       | ACCTTGGAGGTCTTGGGAGT                                              | TTGCAGACACCTTCCAAACA                                               |
| UBC         | TTGCCTTGACATTCTCGATG                                              | ATCGCTGTGATCGTCACTTG                                               |
| AMA1        | CAGTGGCTCATGTGCGAGTTTCCA<br>GA                                    | CGACCTTTCTTTCCATCATTTCATC<br>GG                                    |

645

646

647

**Supplemental Table II:** T7 primers for *in vitro* transcription and SYBR primers for qRT-PCR

| <b>dsiRNAs</b> | <b>Sequence (5' – 3')</b> | <b>Concentration (nM)</b> |
|----------------|---------------------------|---------------------------|
| Control        | CUUCCUCUCUUUCUCUCC        | 10/25                     |
| SMILR          | CCAUAUUUACAUGGAUG         | 25                        |
| STAU1          | GUCAAGGACAUCACACCA        | 10                        |
| CENPF          | GAAUGAUUCACUUAAGGA        | 25                        |
| AURKB          | GGUGAUUCACAGAGACAUAAAGCCA | 25                        |

648  
649  
650  
651

**Supplemental Table III:** IDT Designed dsiRNAs and concentrations used.

652

| <b>Taqman Probe</b> | <b>Assay Number</b> | <b>653</b> |
|---------------------|---------------------|------------|
| UBC                 | Hs01871556_s1       | 654        |
| STAU1               | Hs00244999_m1       |            |
| AURKB               | Hs00945858_g1       |            |
| BUB1B               | Hs01084828_m1       |            |
| AMA1                | Ce02462726_m1       |            |
| CCNA2               | Hs00996788_m1       |            |
| CCNE2               | Hs00180319_m1       |            |
| CDC20               | Hs00426680_mH       |            |
| CENPA               | Hs00156455_m1       |            |
| CENPF               | Hs01118845_m1       |            |
| KIF15               | Hs01085295_m1       |            |
| KIF20A              | Hs00993573_m1       |            |
| MKI67               | Hs01032443_m1       |            |
| NCAPG               | Hs00254617_m1       |            |
| CLSPN               | Hs00898637_m1       |            |
| ESCO2               | Hs00411577_m1       |            |
| EXO1                | Hs01116190_m1       |            |
| MYBL2               | Hs00942540_m1       |            |
| NUSAP1              | Hs01006195_m1       |            |
| PBK                 | Hs00902990_m1       |            |
| SKA1                | Hs00536843_m1       |            |
| SPC24               | Hs00699347_m1       |            |
| UBE2C               | Hs00964100_g1       |            |
| XRCC2               | Hs03044154_m1       |            |

655

656

657

658

**Supplemental Table IV:** Taqman Probes for qRT-PCR

| Antisense Probes | Sequence (5'-3')                                  | 659 |
|------------------|---------------------------------------------------|-----|
| GFP Odd 1        | aaatttggtgccattcacatcgccatccagttccacgaga/3BioTEG/ | 660 |
| GFP Odd 2        | aaagcactgcacgccataagagaaggtagtgaccagtgtt/3BioTEG/ | 661 |
| GFP Odd 3        | agcgcgggtctttagtctcccgatccttgaaaaagatg/3BioTEG/   | 662 |
| GFP Odd 4        | gagttatagttgattccagcttgggccgagaatgttc/3BioTEG/    | 663 |
| GFP Odd 5        | gctgcacggatccatcctcaatggtgtgtctgatcttgaa/3BioTEG/ | 664 |
| SMILR Odd 1      | atggtatgggatagtcacggctgatcccaatgtttgcagc/3BioTEG/ | 665 |
| SMILR Odd 2      | gattcgagtttaggtgagactcgtgagtgtagcttcttg/3BioTEG/  | 666 |
| SMILR Odd 3      | tccatgtaaattatggaattcagcttggttccctaaat/3BioTEG/   | 667 |
| SMILR Odd 4      | ataggtaatccgatcaactatgttgccaaaactcagatg/3BioTEG/  | 668 |
| SMILR Odd 5      | aaagattttcacatggggatggagtgttatagtaatt/3BioTEG/    | 669 |
| SMILR Even 1     | gtgaatatecttaaacagacttcttgaagtgattgca/3BioTEG/    | 670 |
| SMILR Even 2     | ccattacaattcatatccatcatatgcaaatcacactgc/3BioTEG/  | 671 |
| SMILR Even 3     | gaaggagtgcccaacatctcagaaacgaacacagattaa/3BioTEG/  | 672 |
| SMILR Even 4     | tacatcataacattctttagttgggtgagagtcatttc/3BioTEG/   | 673 |
| SMILR Even 5     | atttcagacagaccattatggctaaggcaaaaactcattg/3BioTEG/ | 674 |
|                  |                                                   | 675 |

676

677

678

679

**Supplemental Table V:** Antisense 3' end biotinylated DNA probes for *SMILR* and *GFP* RNA:RNA pulldowns
